# Supplementary material for: Tuning the morphological and electronic structure of amorphous nickel-based electrocatalysts by anion regulation for water oxidation in neutral media
Source: Royal Society of Chemistry journal article supplement (doi:10.1039/c9qi00953a), 2019-01-01
Supplement: c9qi00953a1.pdf [file c9qi00953a1.pdf]

**Tuning the Morphological and Electronic Structure of Amorphous Nickel Based Electrocatalysts  
by Anion Regulation for Water Oxidation in Neutral Media**

*Gang Yuan, <sup>a,b</sup> Yujie Hu, <sup>a</sup> Qiwei Wang, <sup>a</sup> Zihan Wang, <sup>a</sup> Li Wang, <sup>a,b,\*</sup> Xiangwen Zhang, <sup>a,b</sup> Qingfa Wang  
<sup>a,b,\*</sup>*

<sup>a</sup> Key Laboratory for Green Chemical Technology of the Ministry of Education, School of Chemical Engineering and Technology, Tianjin University, 92 Weijin Road, Tianjin 300072, P. R. China.

<sup>b</sup> Collaborative Innovation Centre of Chemical Science and Engineering (Tianjin), Tianjin University, Tianjin 300072, P. R. China.

---

**Corresponding Author**

\* E-mail: [qfwang@tju.edu.cn](mailto:qfwang@tju.edu.cn)

## 1. Experimental

### 1.1 Chemicals

Nickel foam (110 pores per inch; mass density of  $350 \text{ g m}^{-2}$ ) was purchased from Suzhou jiashide metal foam Co., Ltd., China. Sodium hypophosphite ( $\text{NaH}_2\text{PO}_2$ ), sodium acetate ( $\text{CH}_3\text{COONa}$ ), potassium hydroxide (KOH), nickel (II) acetate ( $\text{Ni}(\text{CH}_3\text{COO})_2$ ) are all at 99 %, purchased from Aladdin and used without further purification. Ultrapure water ( $18.2 \text{ M}\Omega \text{ cm}^{-1}$ ; home made by a Millipore, Milli-Q Advantage A10 system) and anhydrous ethanol (99.9%, Jiangtian, China) were used for solution preparation and/or wash work.

### 1.2 Synthesis of Ni-based electrocatalysts

Amorphous nickel hydroxide phosphide/phosphate on Ni foam, referred to as Ni-OH/P/PO<sub>4</sub>, were prepared by a simple one-step hydrothermal process. A piece of Ni foam, which was pretreated by ultrasonication in acetone, 6M HCl, ethanol and ultrapure water successively for 5 minutes each, was immersed into a Teflon-lined stainless steel autoclave containing a 30 mL aqueous solution of 5 mM  $\text{Ni}(\text{CH}_3\text{COO})_2$ , 5 mM  $\text{CH}_3\text{COONa}$ , and 0.5 M  $\text{NaH}_2\text{PO}_2$ . Then, the autoclave was sealed for hydrothermal reaction at 180 °C for 4 h to obtain Ni-OH/P/PO<sub>4</sub>. After the autoclave was cooled down to room temperature, the samples were rinsed with copious distilled water and then dried in an electric oven at 60 °C for 12 h.

### 1.3 Physical characterization

The X-ray diffraction (XRD) spectra of samples was identified by an X'Pert Pro X-ray diffractometer (Panalytical, Netherlands), using Cu K $\alpha$  radiation at 40 kV, 40 mA. The morphology and thickness of the film were examined by scanning and transmission electronic microscopy (SEM, S-4800, and TEM, JEOL JEM-2100F, respectively), and high-resolution TEM (HRTEM). Energy dispersive X-ray spectroscopy (EDS) was carried out to determine the compositions and elemental dispersion. X-ray photoelectron spectroscopy (XPS, PHI QUANTERA-II SXM) was performed to confirm the elemental composition and examine their surface states. Inductively-coupled plasma optical emission spectroscopy (ICP-OES) was conducted for quantitative analysis of element content.

### 1.4 Electrochemical measurements

The electrochemical tests were conducted with an Autolab 302N electrochemical workstation (Nova, Netherland) in 25 °C water bath. A typical three-electrode setup was used for all the tests with platinum gauze as a counter electrode. An Hg/HgO (1M KOH) or a SCE electrode was used as a reference electrode, when the experiment was carried out in an alkaline (1M KOH) or a neutral (1M PBS) electrolyte respectively. Prior and during all the electrochemical tests, O<sub>2</sub> was continuous bubbled over the electrolyte to ensure the O<sub>2</sub>/H<sub>2</sub>O equilibrium (1.23 V vs RHE). The reference electrode was calibrated in H<sub>2</sub>-saturated electrolyte over a reverse hydrogen electrode (RHE). Linear sweep voltammetry (LSV) and cyclic voltammetry (CV) were performed at sweeping rates of  $5 \text{ mV s}^{-1}$ .

2. Supplementary Figures

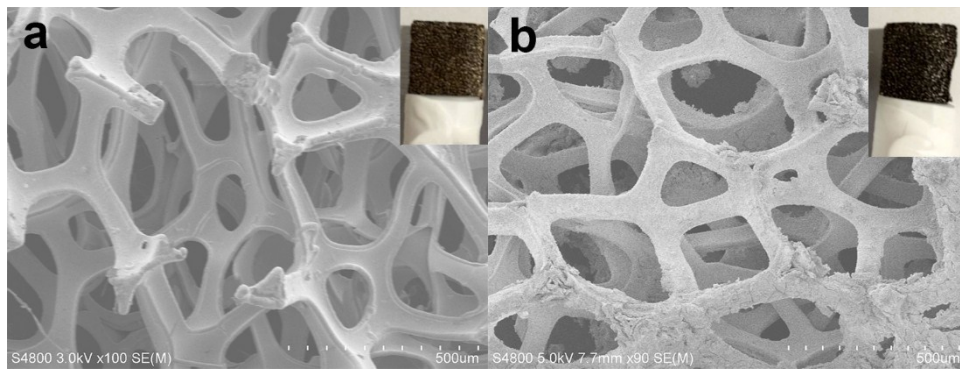

**Fig. S1.** SEM images of (a) bare NF, and (b) Ni(OH)<sub>2</sub>/Ni:Pi. The insets are the corresponding bulk sample.

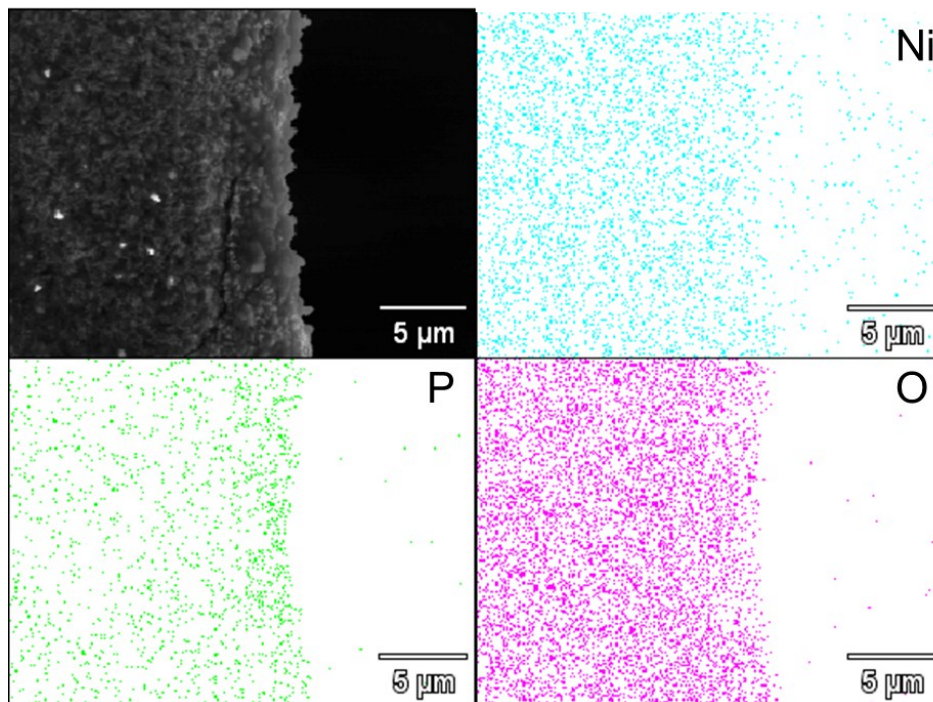

**Fig. S2** EDS elemental mapping of Ni(OH)<sub>2</sub>/Ni:Pi. Ni: blue, P: green, and O: red.

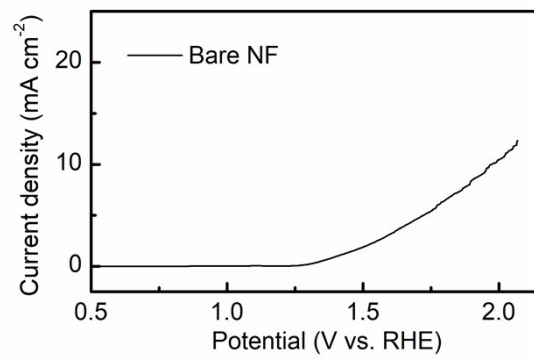

**Fig. S3** LSV plots of bare NF at a scan rate of  $2 \text{ mV s}^{-1}$  in a  $1.0 \text{ M}$  PBS solution.

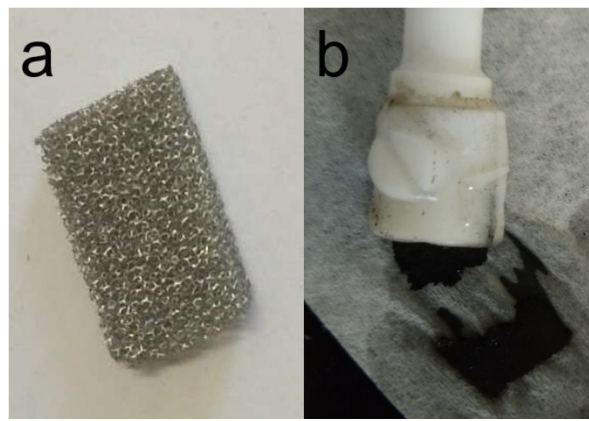

**Fig. S4** Digital photos of (a) bare NF and (b) NF tested in a  $1.0 \text{ M}$  PBS solution from 0 to 2 V at a scan rate of  $2 \text{ mV s}^{-1}$ .

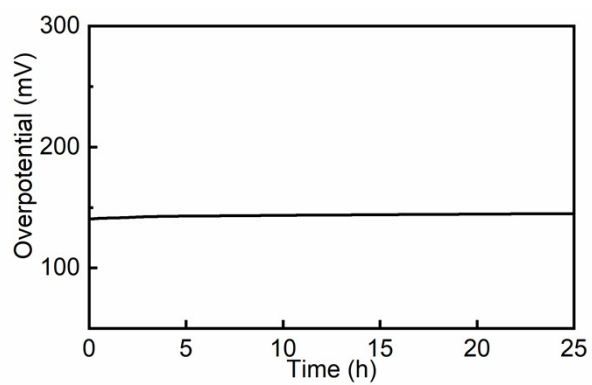

**Fig. S5** Chronopotentiometric curves of Ni(OH)<sub>2</sub>/Ni:Pi at a constant current density of 1 mA cm<sup>-2</sup> in a 1.0 M PBS solution for 25 h.
